# Supplementary material for: Functionally distinct promoter classes initiate transcription via different mechanisms reflected in focused versus dispersed initiation patterns
Source: PubMed Central journal article supplement (PMC10183819; doi:10.15252/embj.2023113519), 2023-04-04
Supplement: EMBJ-42-e113519-s002.pdf [file EMBJ-42-e113519-s002.pdf]

# Functionally distinct promoter classes initiate transcription via different mechanisms reflected in focused versus dispersed initiation patterns

## Appendix

### Table of Contents

- |                       |        |
|-----------------------|--------|
| 1. Appendix Figure S1 | page 2 |
| 2. Appendix Figure S2 | page 3 |

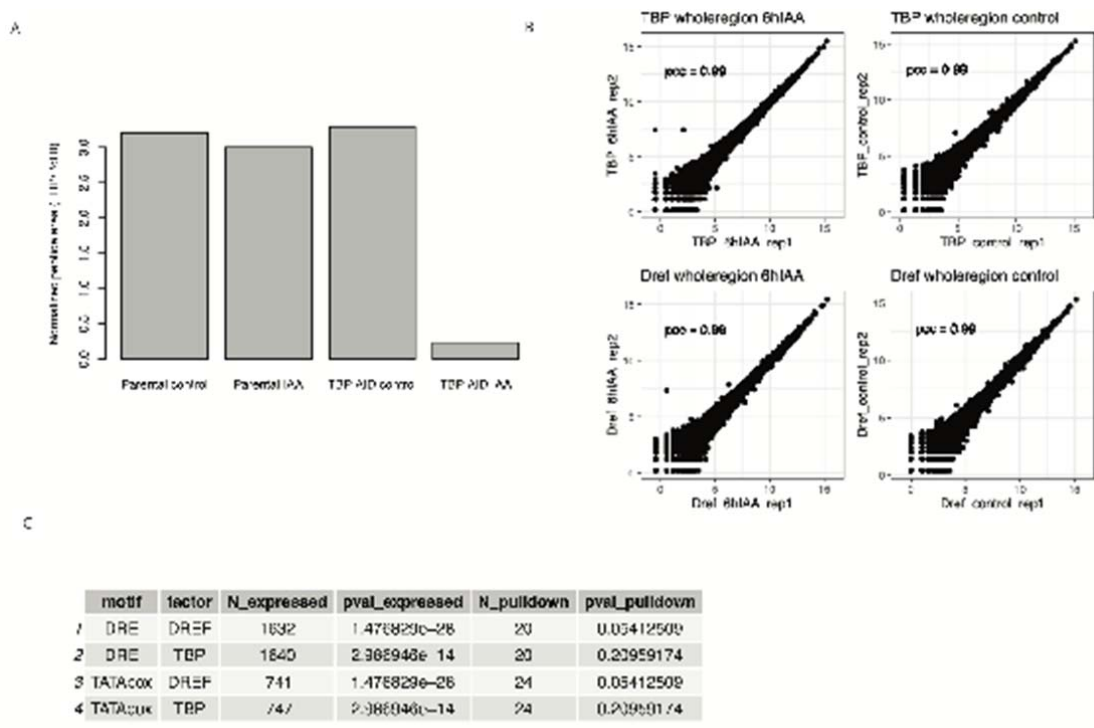

**Appendix Fig S1. TBP and DREF are required by distinct sets of promoters**

- A. Mass-spectrometric quantification of TBP protein abundance in the parental cell line expressing the Tir1 ligase and the TBP N-terminally tagged AID cell line after 6 hours of 500uM auxin treatment. Normalize peptide abundance from label free mass-spectrometric quantification indicates roughly 3% of TBP remains after auxin treatment as compared to the control.
- B. Pearson correlation of PRO-seq signal along the promoter and gene body region of all protein-coding transcripts using library-normalized reads between biological replicates. Correlation coefficient displayed.
- C. The number of DRE and TATA-Box expressed promoters in each of the DREF and TBP AID tagged cell lines. P-value calculated with FDR indicate down-regulation of TATA-Box or DRE promoters compared with all expressed promoters.

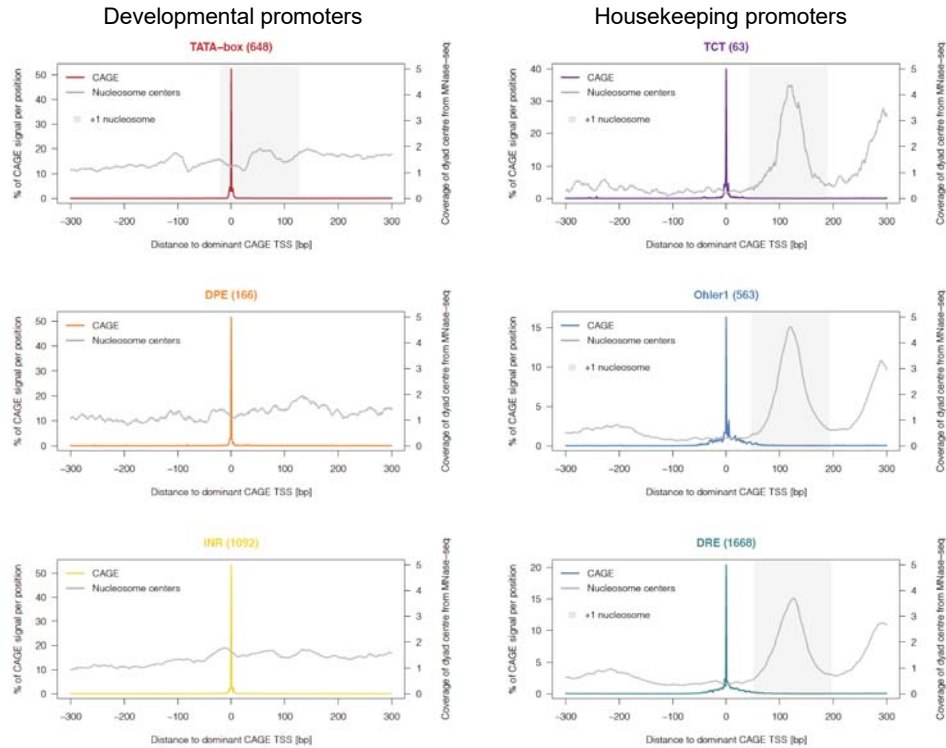

**Appendix Fig S2. Housekeeping and developmental promoters differ in the +1 nucleosome positioning in relation to the TSS.**

MNase-seq data from mix embryos (0-24 hours) obtained from Chereji et al., 2016 was plotted centered on the dominant CAGE annotated TSS for each motif-containing promoter type. Developmental promoters: TATA-box, DPE and INR; housekeeping promoters: TCT, Ohler1 and DRE. +1 nucleosome center is the point of highest coverage of MNase fragment centres in +1 to +200bp window relative to the TSS. Developmental promoters not showing a preferred nucleosomal position in relation to the TSS, while housekeeping promoters exhibit a peak downstream of the TSS.
